# Supplementary figures and images for: Investigating the impact of development and internal validation design when training prognostic models using a retrospective cohort in big US observational healthcare data
Source: PubMed Central journal article supplement — BMJ Open. 2021 Dec 24;11(12):e050146. doi: 10.1136/bmjopen-2021-050146 (PMC8710861; doi:10.1136/bmjopen-2021-050146), 2021-12-24

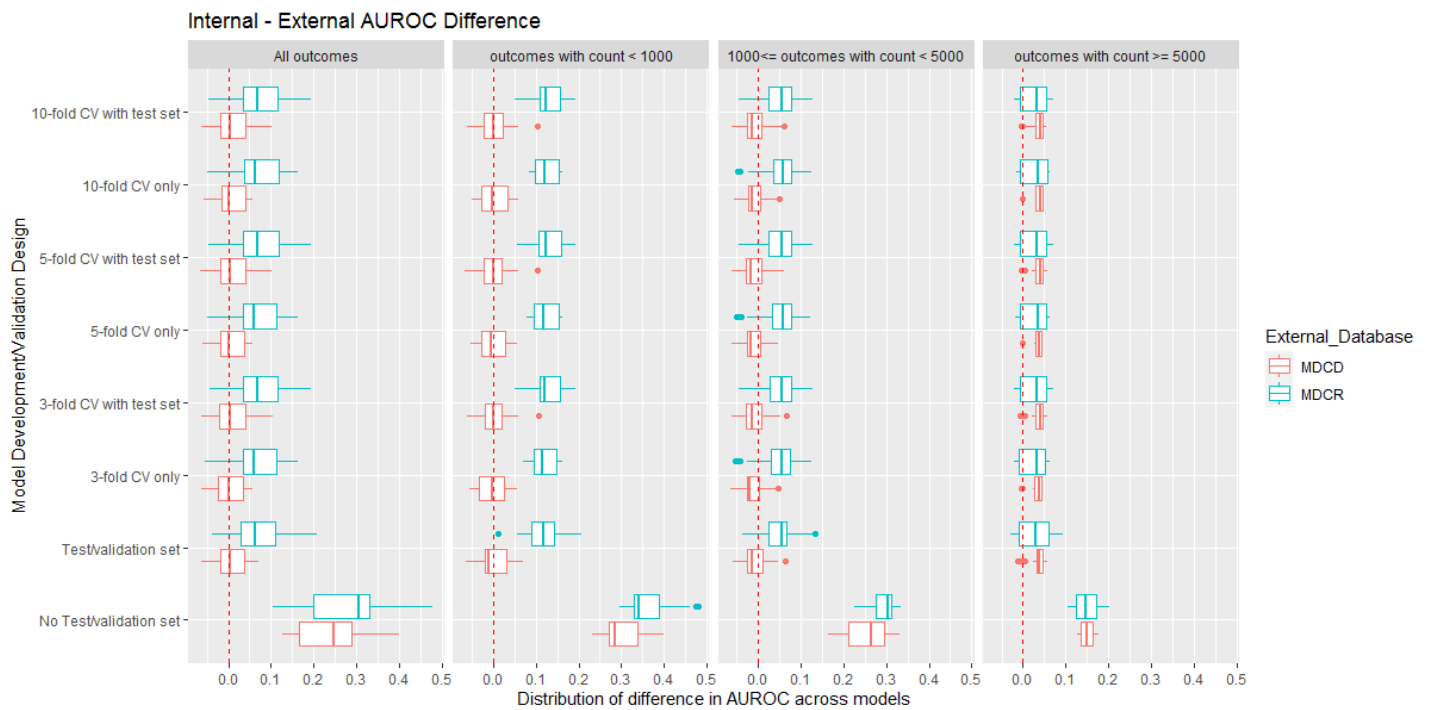

Supplement: bmjopen-2021-050146supp001.pdf [file bmjopen-2021-050146supp001.pdf]

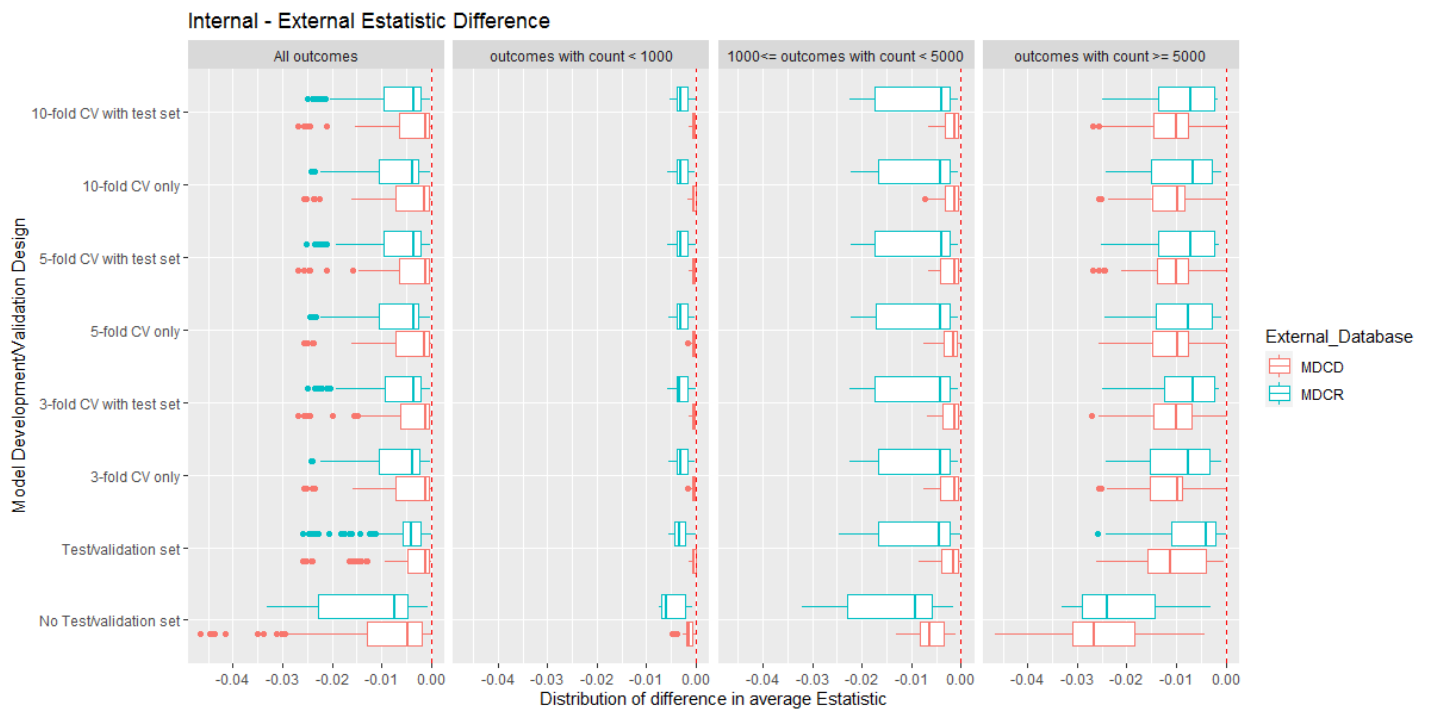

Supplement: bmjopen-2021-050146supp003.pdf [file bmjopen-2021-050146supp003.pdf]
