# Supplementary figures and images for: Investigating the impact of development and internal validation design when training prognostic models using a retrospective cohort in big US observational healthcare data
Source: HighWire-hosted journal article supplement (doi:10.1136/bmjopen-2021-050146), 2021-12-01

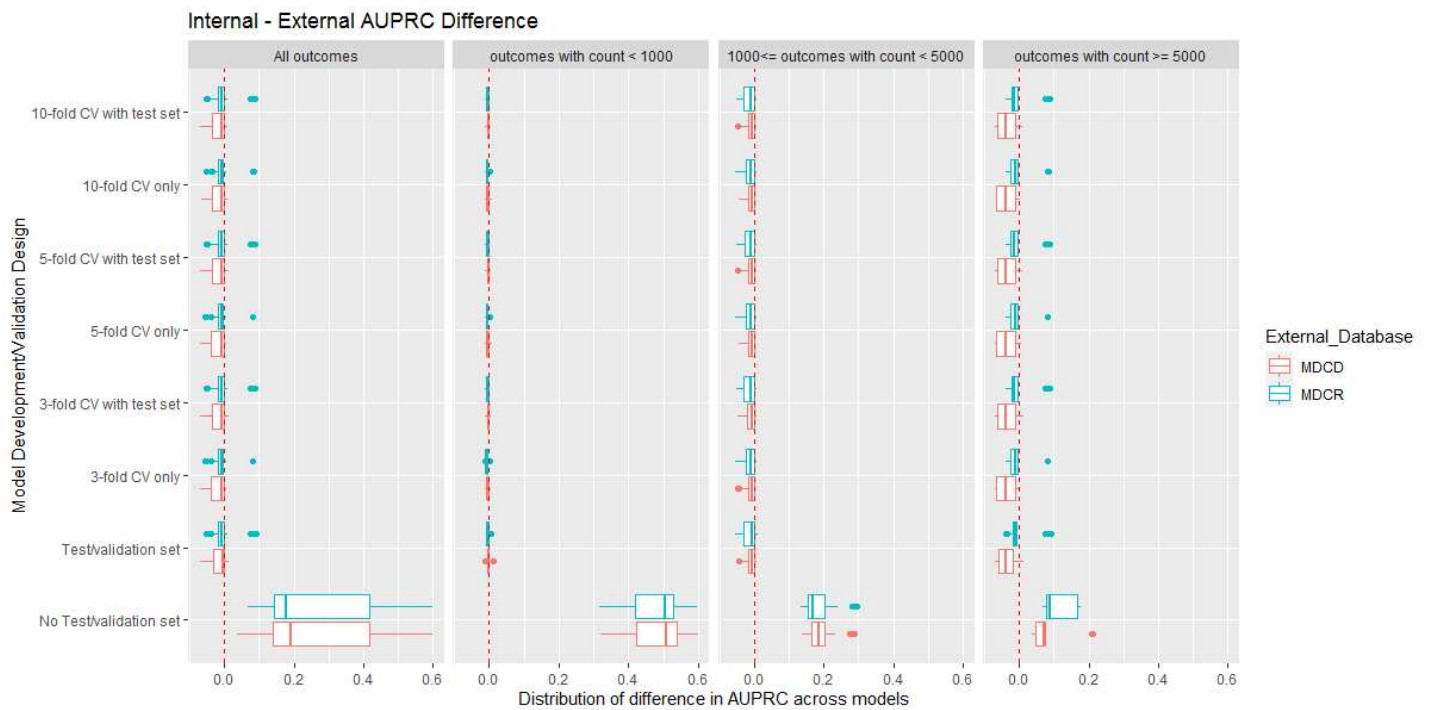

Supplement: bmjopen-2021-050146supp002_data_supplement.pdf [file bmjopen-2021-050146supp002_data_supplement.pdf]
